# Supplementary material for: Secretome of apoptotic peripheral blood cells (APOSEC) attenuates microvascular obstruction in a porcine closed chest reperfused acute myocardial infarction model: role of platelet aggregation and vasodilation
Source: PubMed Central journal article supplement (PMC3442164; doi:10.1007/s00395-012-0292-2), 2012-08-17
Supplement: 395_2012_292_MOESM1_ESM.pdf [file 395_2012_292_MOESM1_ESM.pdf]

# Suppl. Figure 1

(a)

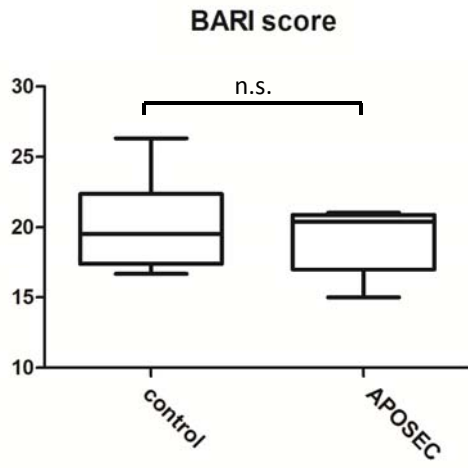

n=6-7

(b)

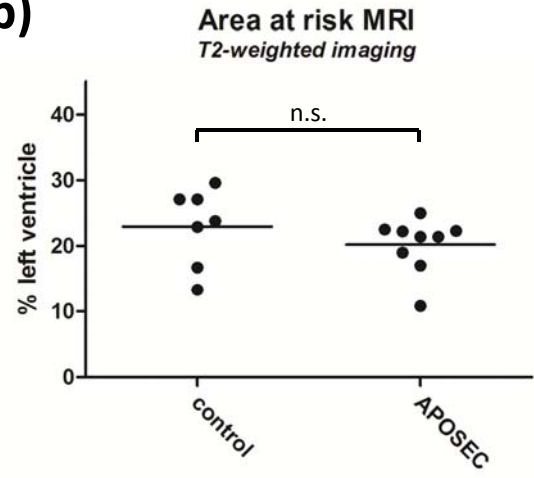

n=7-9

# Suppl. Figure 2

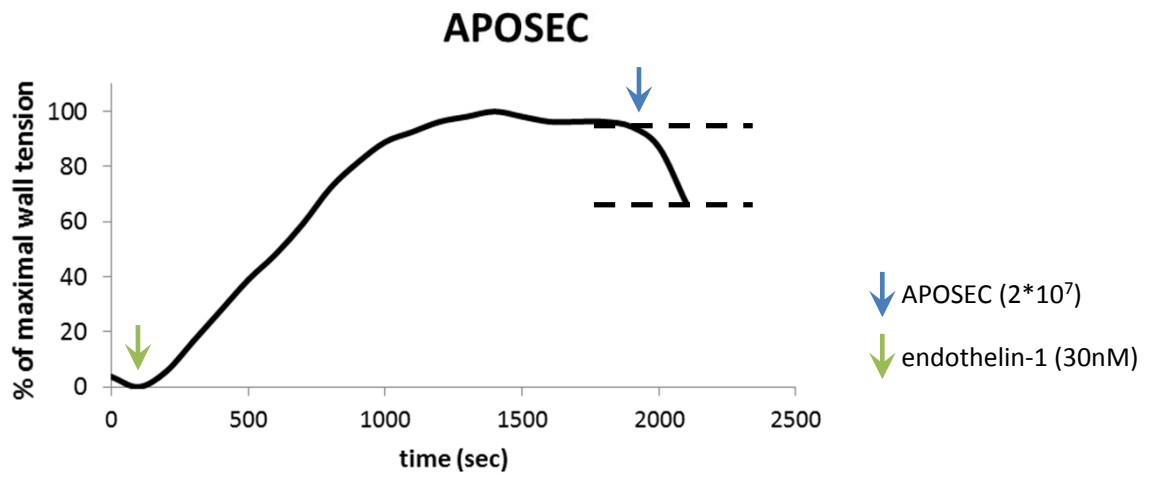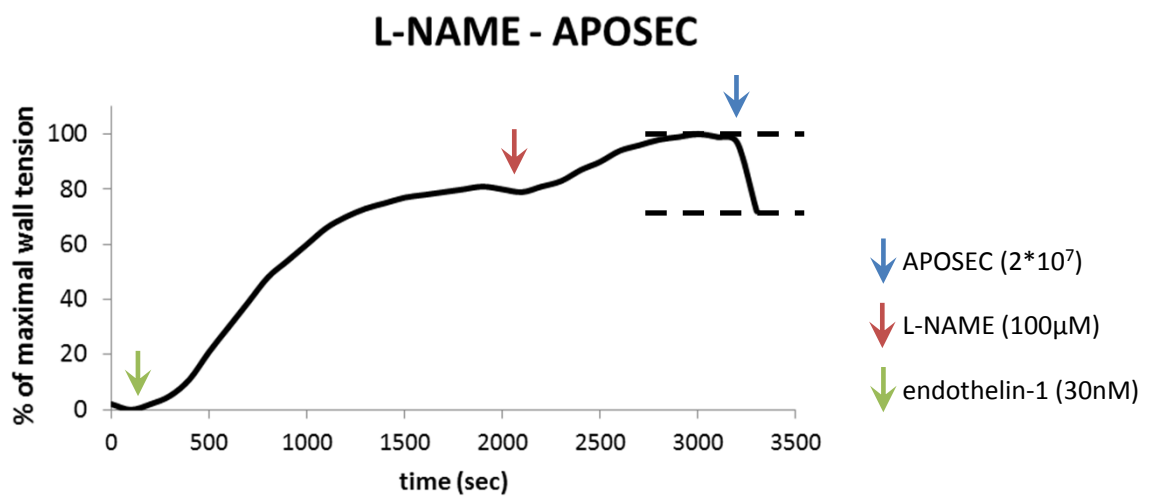

# Suppl. Figure 3

(a)

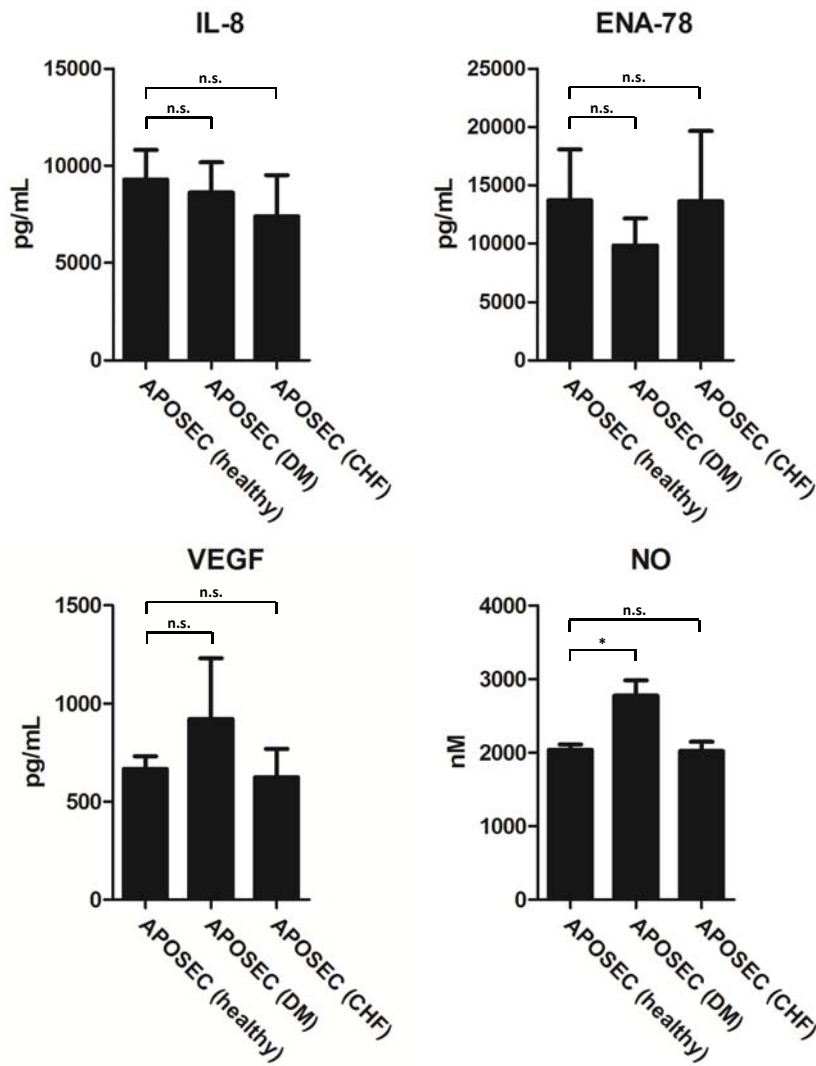

n=6-7

(b)

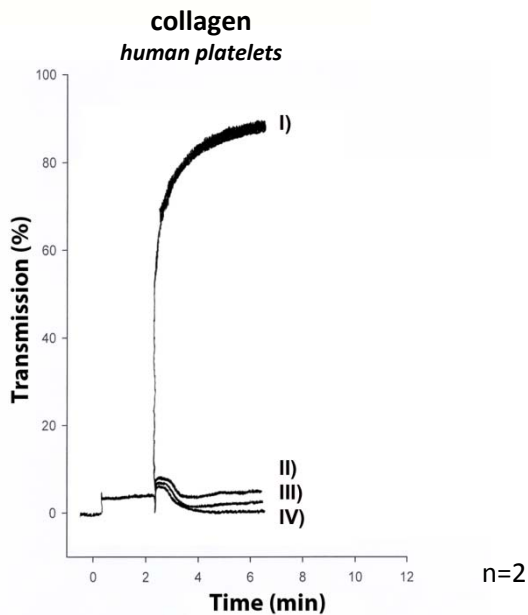

# Suppl. Figure 4

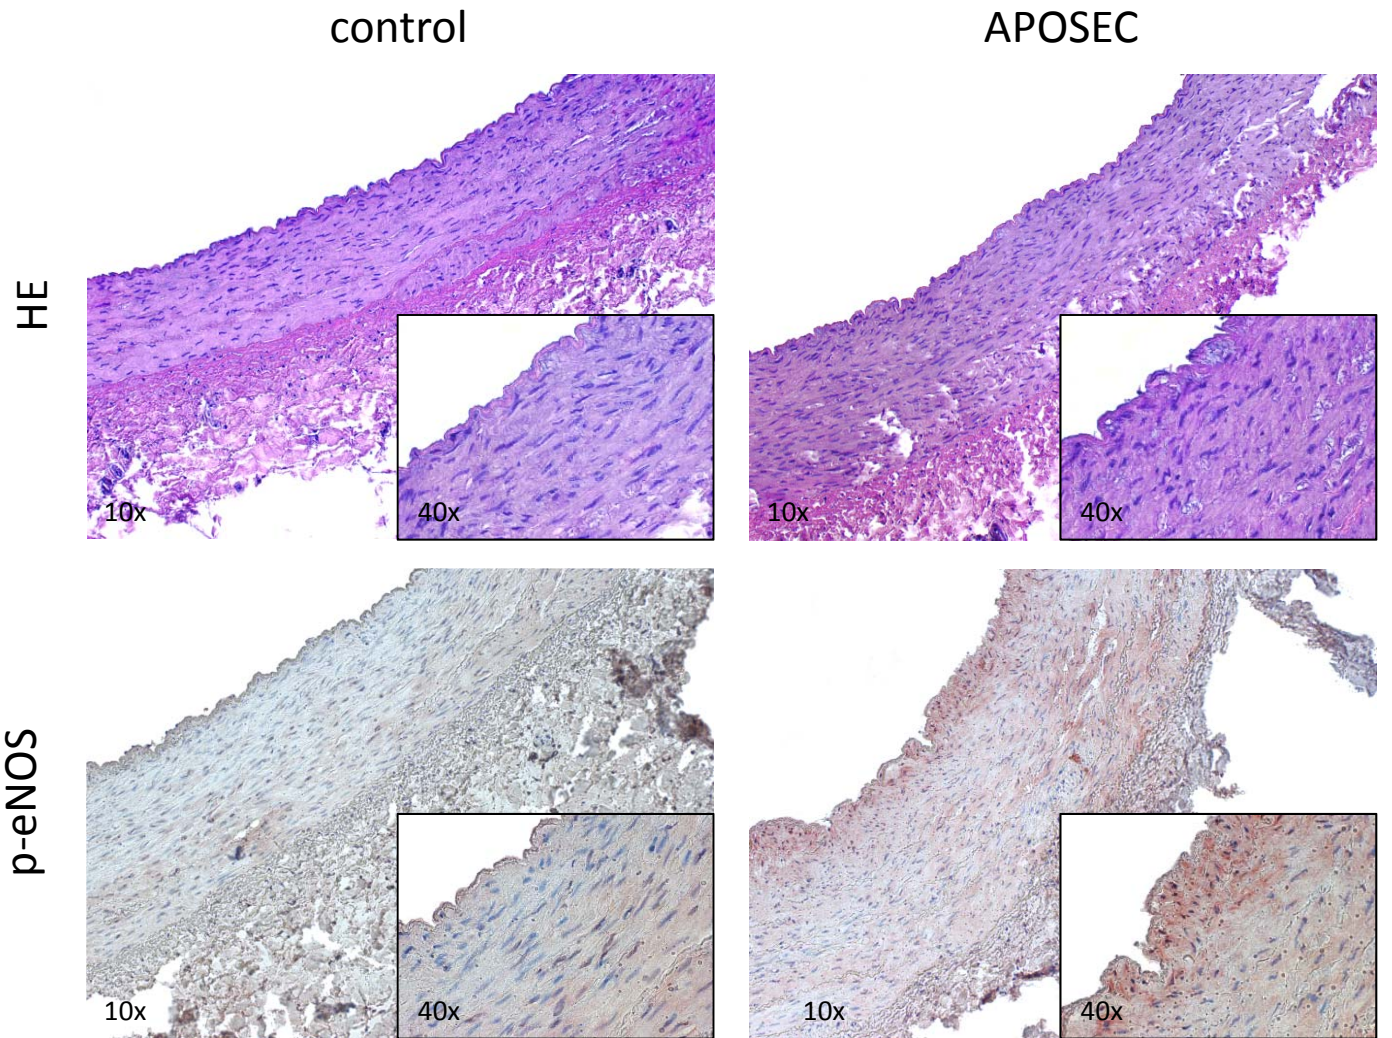

n=3
